# Supplementary material for: The first biosynthetic studies of the azinomycins: acetate incorporation into azinomycin BElectronic supplementary information (ESI) available: experimental procedures for fermentation of S. sahachiroi and isolation of azinomycin B, NMR data from labeling experiments. See http://www.rsc.org/suppdata/cc/b4/b400093e/
Source: Royal Society of Chemistry journal article supplement (doi:10.1039/b400093e), 2004-01-01

## Supporting Information for:

### The First Biosynthetic Studies of the Azinomycins – Acetate Incorporation into Azinomycin B

Christophe Corre, Philip A.S. Lowden\*

Dr. Philip A.S. Lowden<sup>‡</sup>, Christophe Corre  
School of Biological and Chemical Sciences  
University of Exeter  
Stocker Road  
Exeter EX4 4QD (U.K.)  
Fax. 44 (0)207 6316270  
Tel. +44 (0)207 0790789  
email: p.lowden@bbk.ac.uk

<sup>‡</sup> Current Address:

Dr. Philip A.S. Lowden  
School of Biological and Chemical Sciences  
Birkbeck College, University of London  
Malet Street  
London WC1E 7HX (U.K.)

## Contents:

Experimental procedures

NMR spectra:

1. <sup>13</sup>C NMR spectrum in CDCl<sub>3</sub> of unlabeled azinomycin B.
2. <sup>13</sup>C NMR spectrum in CD<sub>2</sub>Cl<sub>2</sub> of unlabeled azinomycin B.
3. HMBC <sup>1</sup>H-<sup>13</sup>C correlation spectrum of the naphthoate fragment of azinomycin B, used to reassign C4'a and C5'.
4. <sup>13</sup>C NMR spectrum in d<sub>6</sub>-DMSO of the naphthoate fragment of azinomycin B after feeding 1-<sup>13</sup>C acetate.
5. <sup>13</sup>C NMR spectrum in CDCl<sub>3</sub> of azinomycin B after feeding 1-<sup>13</sup>C acetate.
6. <sup>13</sup>C NMR spectrum in CD<sub>2</sub>Cl<sub>2</sub> of azinomycin B after feeding 2-<sup>13</sup>C acetate.
7. <sup>13</sup>C NMR spectrum in CDCl<sub>3</sub> of azinomycin B after feeding 1,2-<sup>13</sup>C<sub>2</sub> acetate.
8. <sup>13</sup>C NMR spectrum in CD<sub>2</sub>Cl<sub>2</sub> of azinomycin B after feeding 1,2-<sup>13</sup>C<sub>2</sub> acetate.
9. <sup>13</sup>C NMR spectrum in CDCl<sub>3</sub> of azinomycin B after feeding methyl-<sup>13</sup>C-methionine.
10. ESMS spectrum of azinomycin B after feeding methyl-<sup>13</sup>C-methionine.

**Experimental procedures:** A 100 ml seed culture of *S. sahachiroi* (NRRL 2485), maintained on GYM agar plates (glucose monohydrate, 4 g/L; yeast extract, 4 g/L; malt extract, 10 g/L; CaCO<sub>3</sub>, 2 g/L; agar, 12 g/L; tap water to balance; adjusted to pH 6.8 with NaOH, 1 M before sterilisation) at 28 °C, was grown in PS5 medium (Pharmamedia, 5 g/L; starch, 5 g/L; tap water to balance; adjusted to pH 6.0) at 30 °C, 200 rpm for 24 hours then 25 ml was used to inoculate 500 ml of PS5 medium, which was grown at 30 °C, 200 rpm for 72 hours. Aqueous solutions of labeled precursors (purchased from Cambridge Isotope Labs) were added through a 0.2 µm filter at concentrations and times as outlined in the text. After centrifugation of the cultures, azinomycin B was isolated by extraction of the supernatant (pH 8.0) with an equal volume of chloroform at 4°C, concentration and then a series of precipitations. For each 100 ml of culture, the residue was precipitated from 600 µl chloroform/hexane (1:29), centrifuged at 2000 rpm and the supernatant discarded. This was repeated and then the residue dissolved in 600 µl chloroform/hexane (2:1), centrifuged and the supernatant retained. This residue was then dissolved in 600 µl chloroform/diethyl ether (1:4), centrifuged and the supernatant concentrated to give pure azinomycin B (~1.5 mg per 100 ml). <sup>13</sup>C NMR spectra were obtained on a Bruker Advance 400 at 100.6 MHz in CDCl<sub>3</sub> or CD<sub>2</sub>Cl<sub>2</sub>, referenced to solvent.

1.  $^{13}\text{C}$  NMR spectrum in  $\text{CDCl}_3$  of unlabeled azinomycin B.

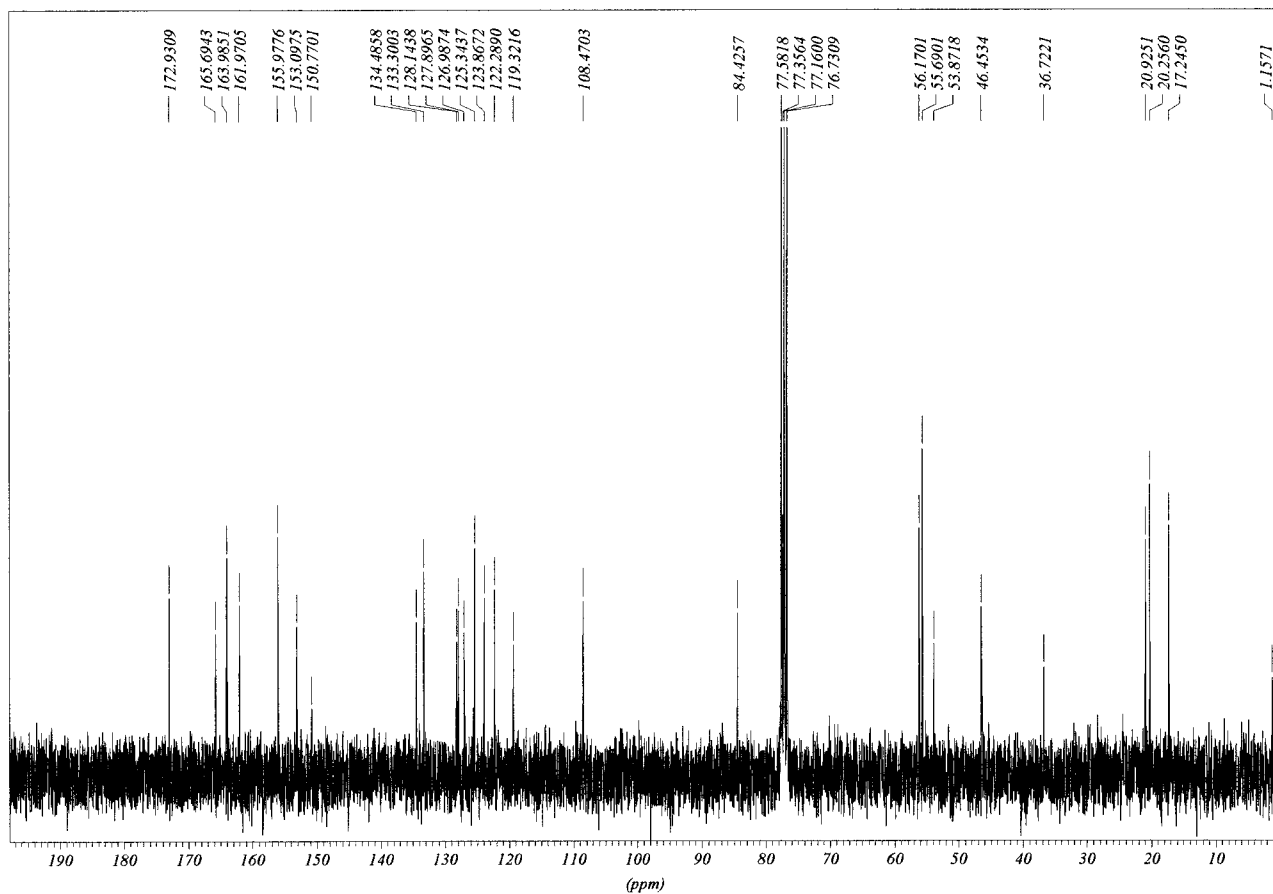

## 2. $^{13}\text{C}$ NMR spectrum in $\text{CD}_2\text{Cl}_2$ of unlabeled azinomycin B.

Resonances from an unidentified impurity are marked with X.

The expansion shows C12, C13, C18 and residual chloroform.

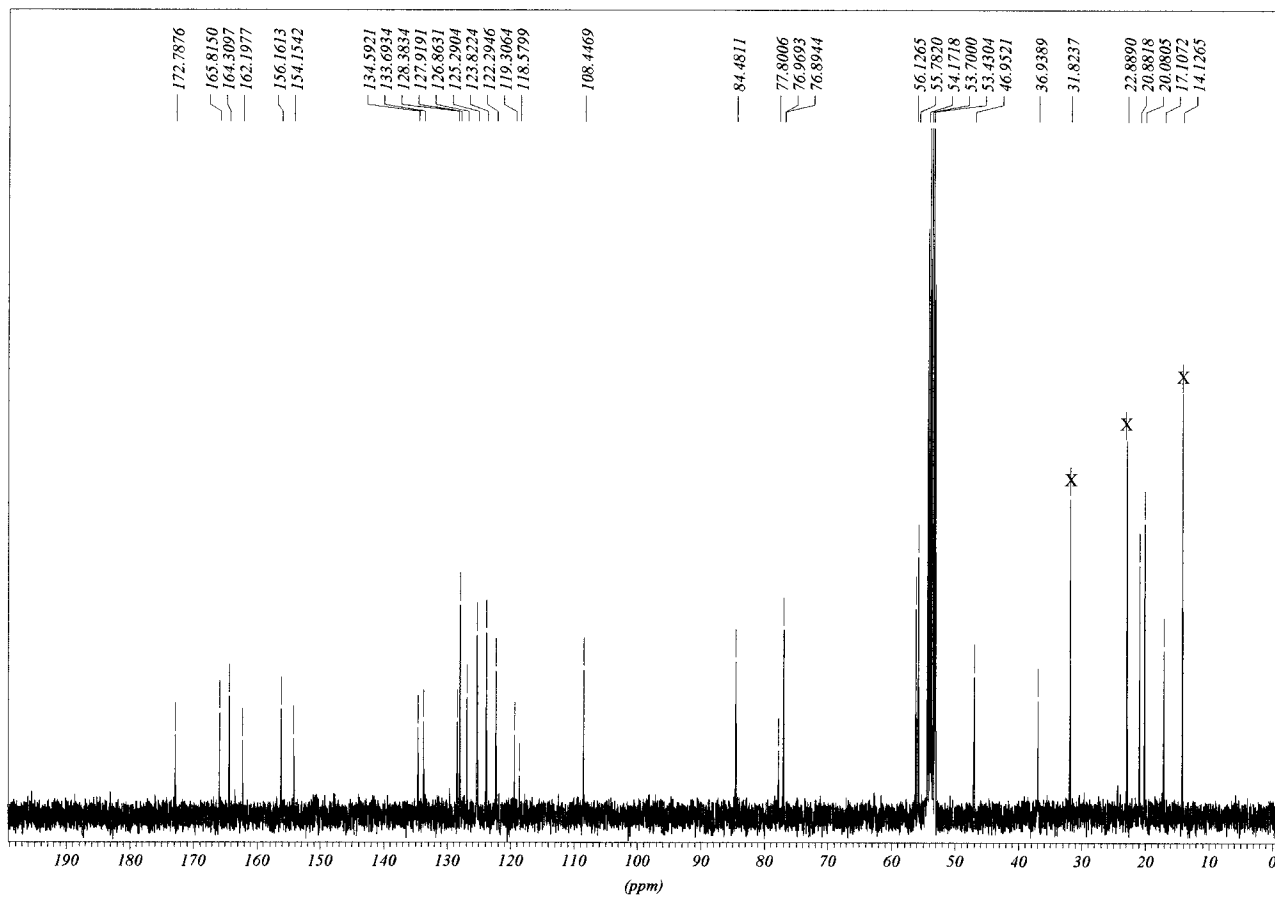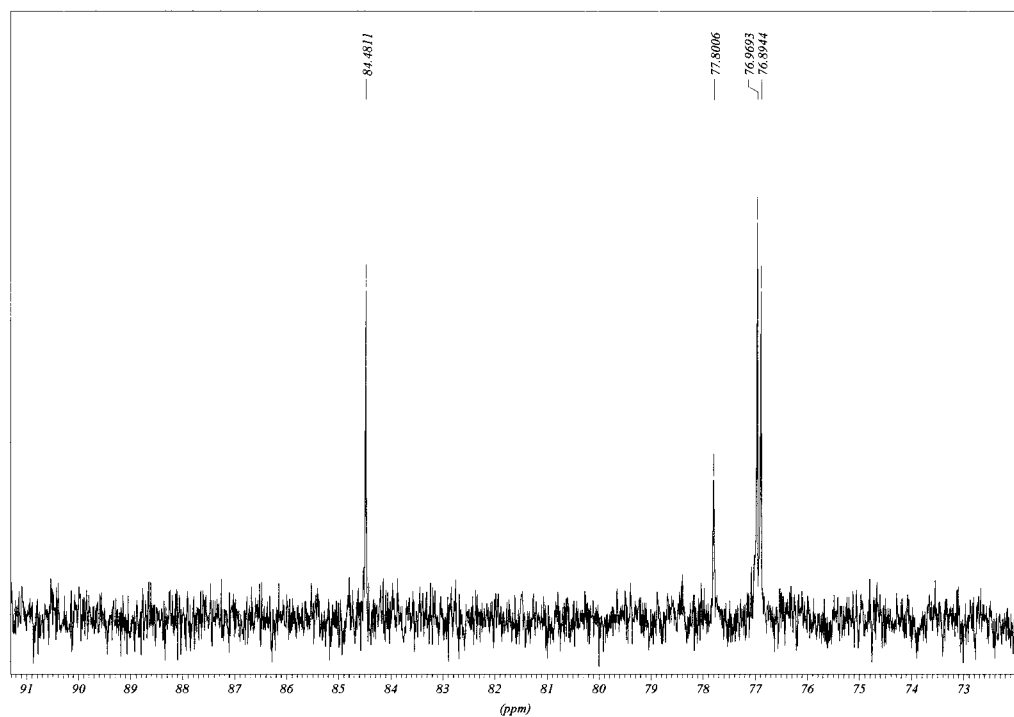

### 3. HMBC $^1\text{H}$ - $^{13}\text{C}$ correlation spectrum of the naphthoate fragment of azinomycin B.

These data were used to reassign C4'a and C5'.

HMBC

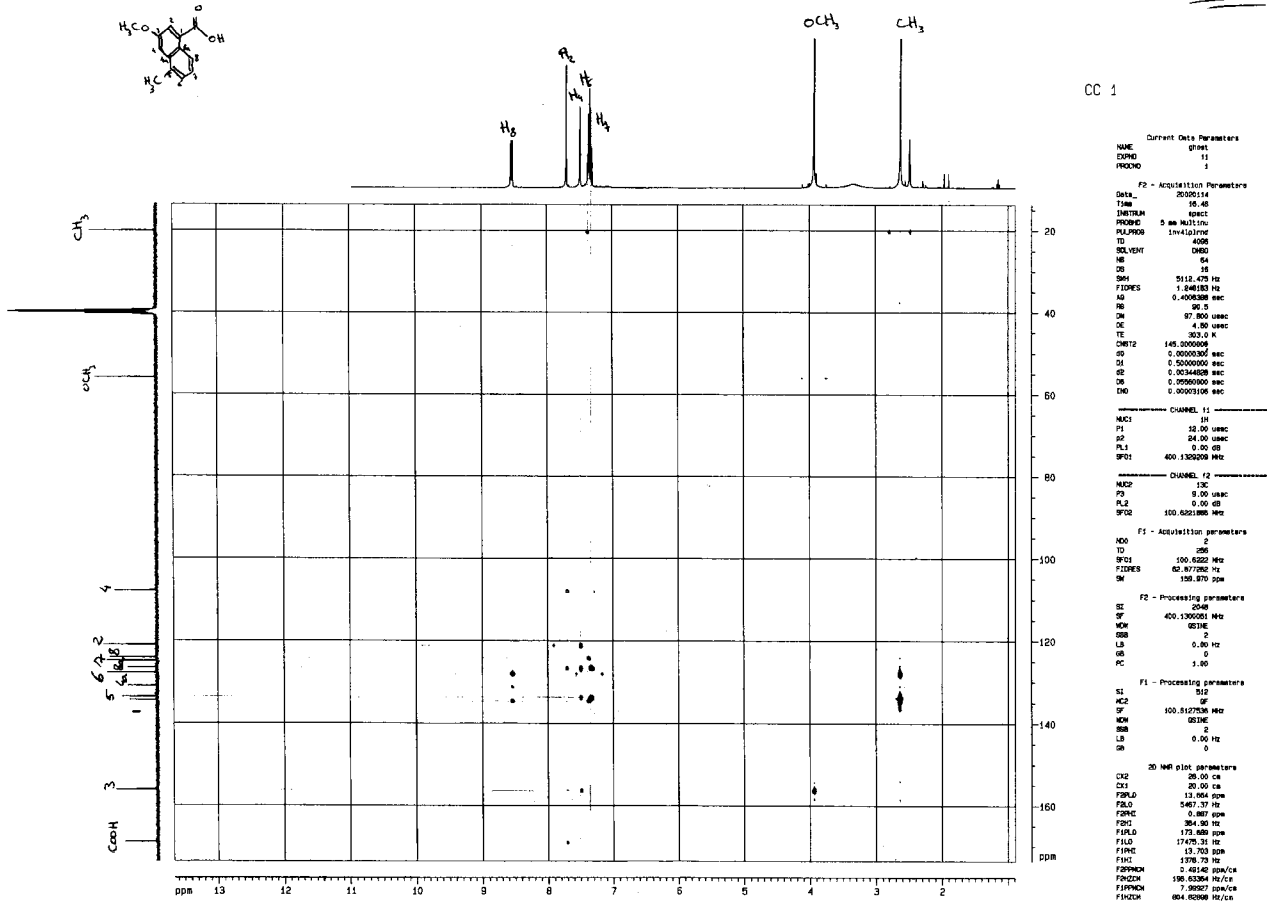

4.  $^{13}\text{C}$  NMR spectrum in  $\text{d}_6\text{-DMSO}$  of the naphthoate fragment of azinomycin B after feeding  $1\text{-}^{13}\text{C}$  acetate.

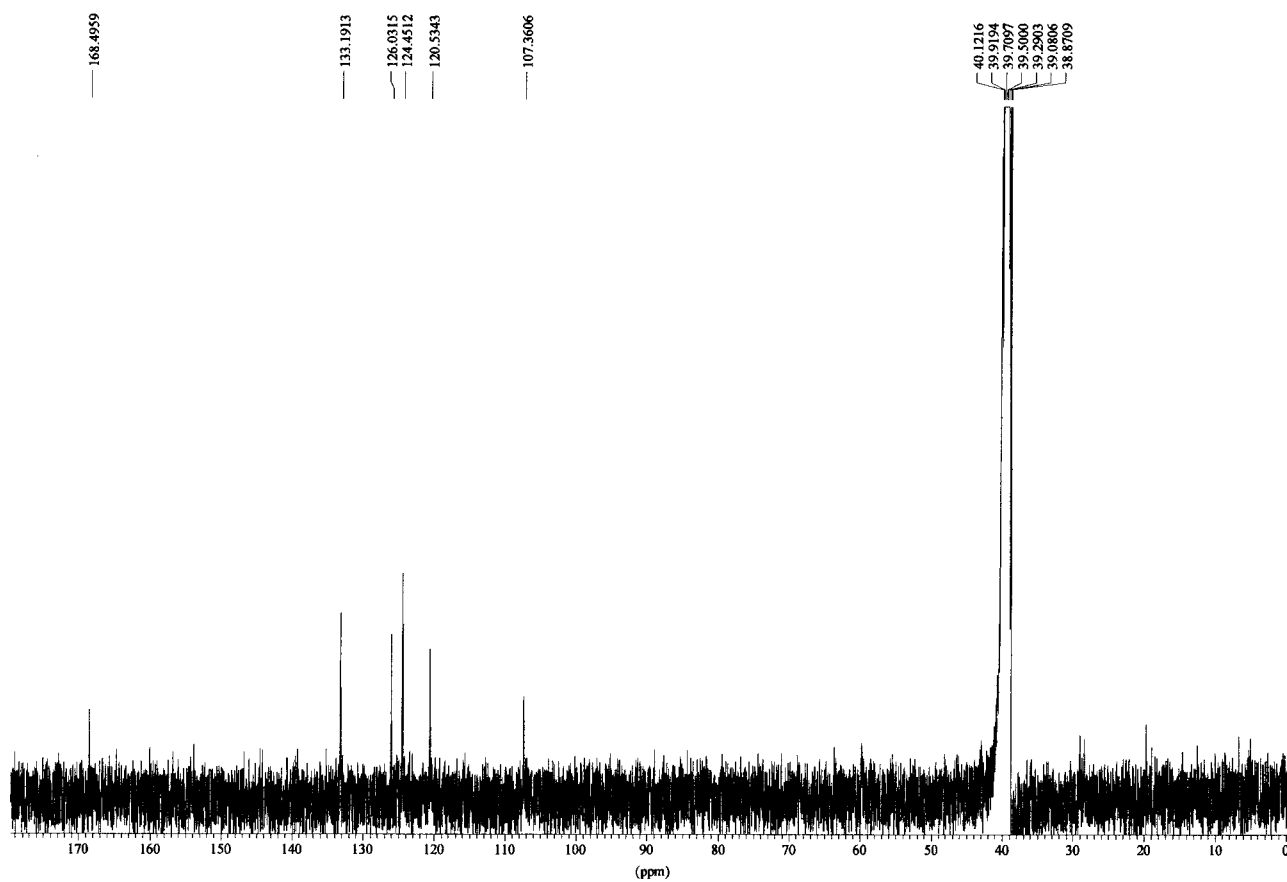

5.  $^{13}\text{C}$  NMR spectrum in  $\text{CDCl}_3$  of azinomycin B after feeding  $1\text{-}^{13}\text{C}$  acetate.

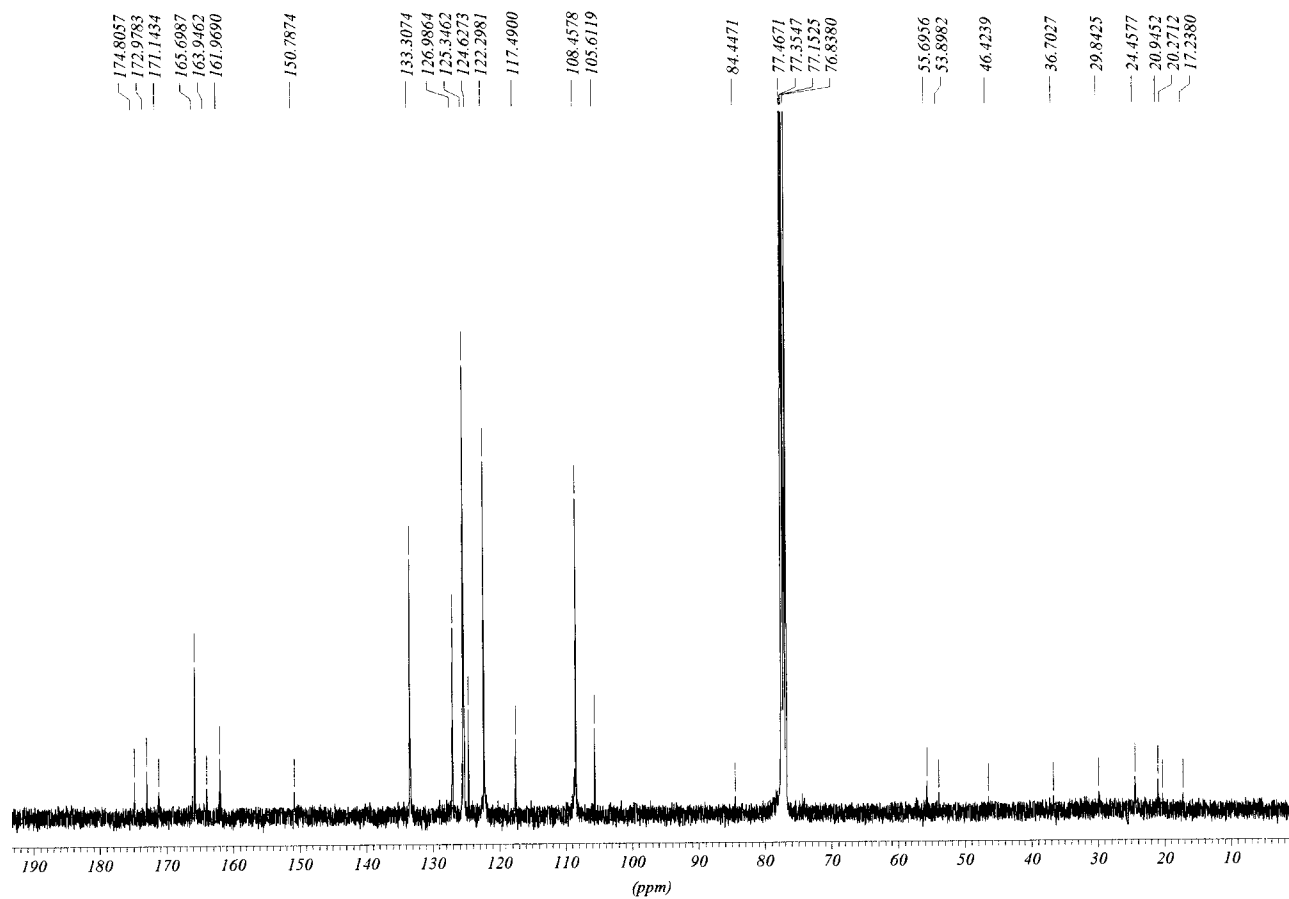

Expansions of  $^{13}\text{C}$  NMR spectrum in  $\text{CDCl}_3$  of azinomycin B after feeding  $1\text{-}^{13}\text{C}$  acetate.

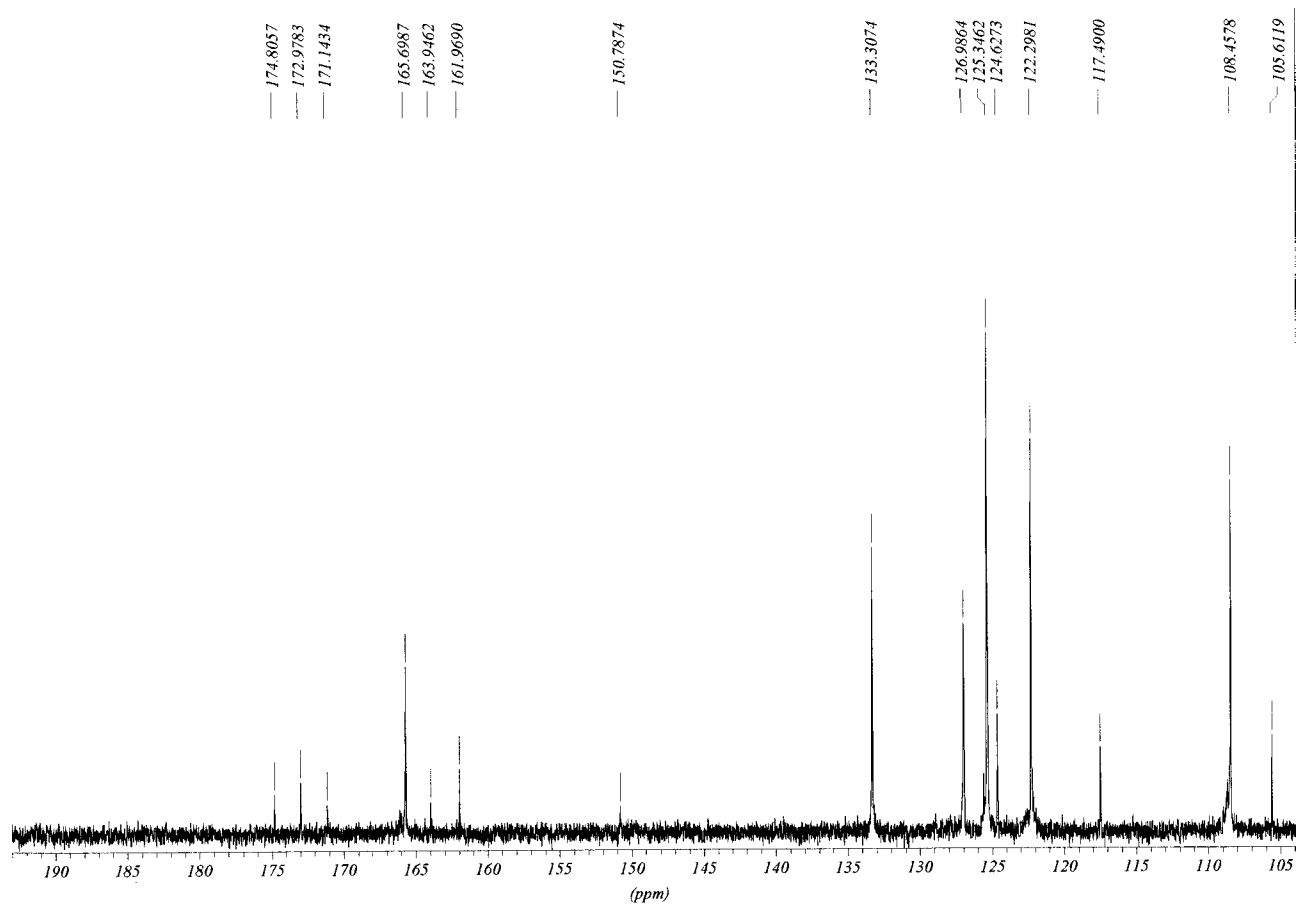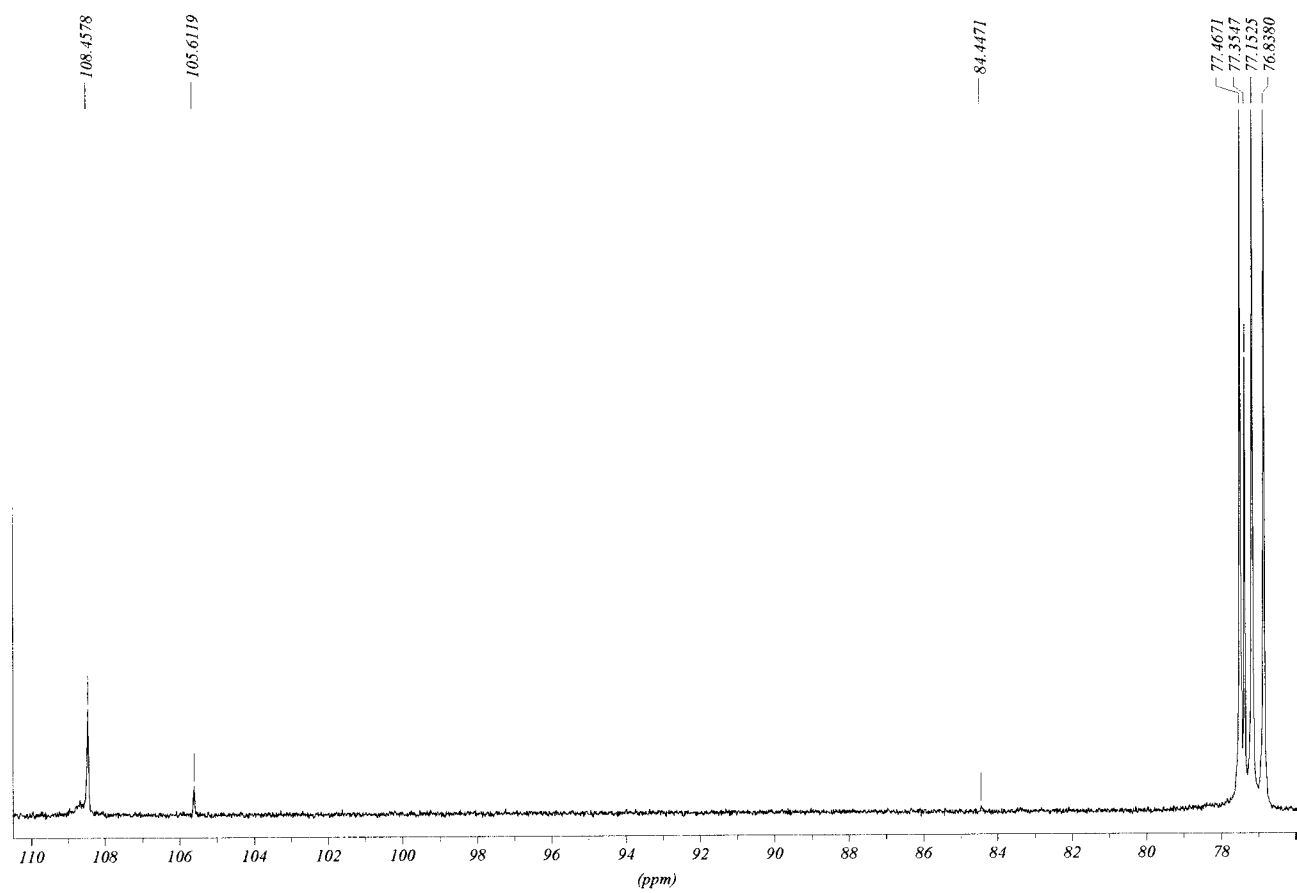

6.  $^{13}\text{C}$  NMR spectrum in  $\text{CD}_2\text{Cl}_2$  of azinomycin B after feeding  $2\text{-}^{13}\text{C}$  acetate.

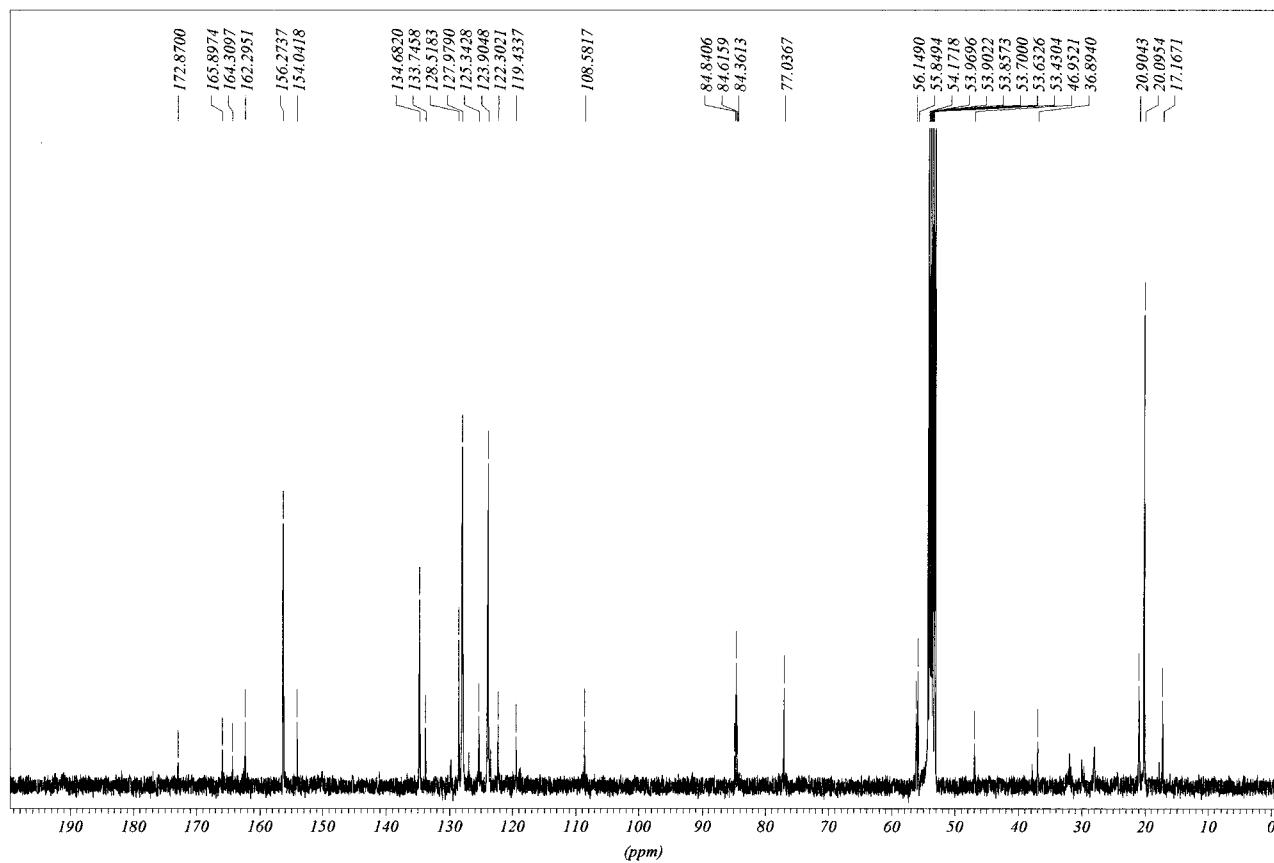

7.  $^{13}\text{C}$  NMR spectrum in  $\text{CDCl}_3$  of azinomycin B after feeding  $1,2\text{-}^{13}\text{C}_2$  acetate.

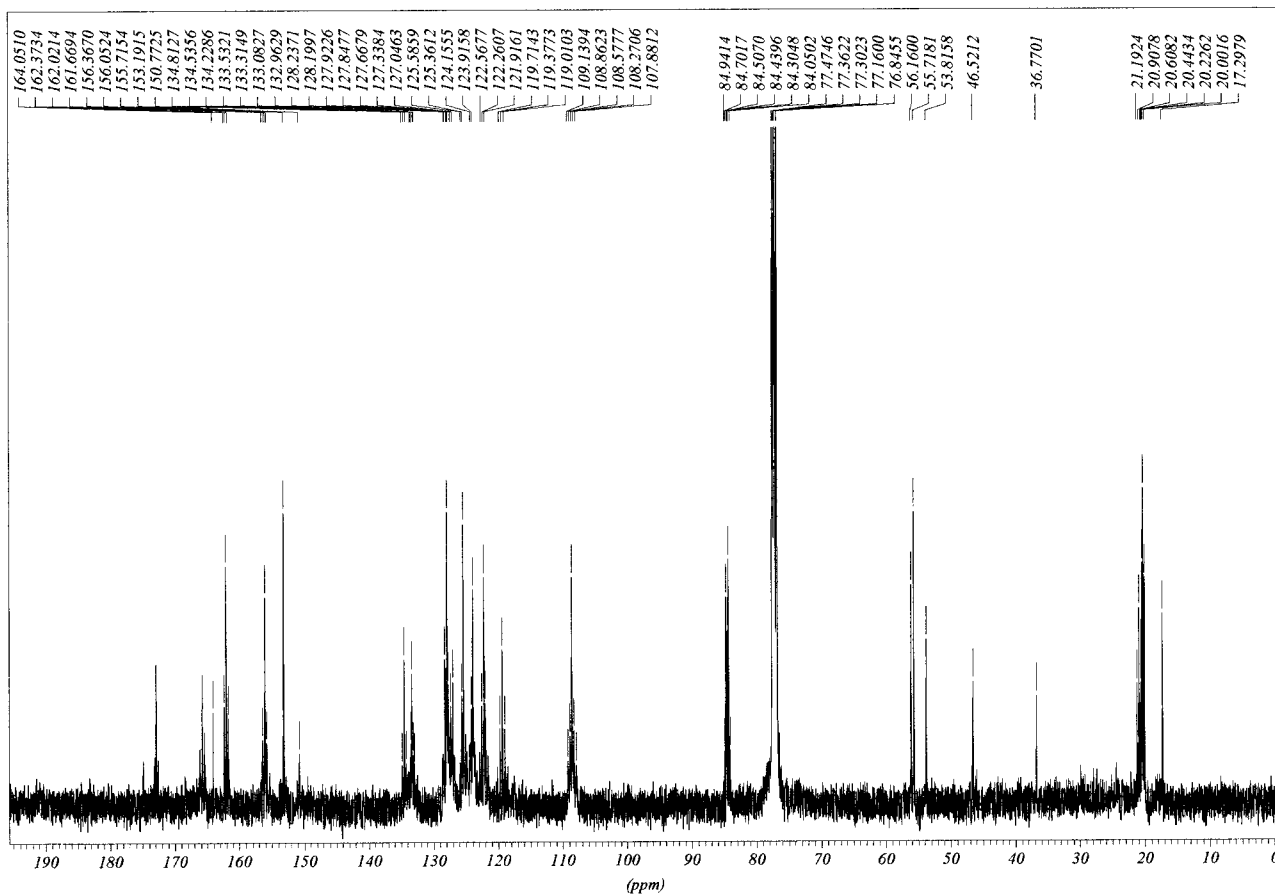

Expansions of  $^{13}\text{C}$  NMR spectrum in  $\text{CDCl}_3$  of azinomycin B after feeding  $1,2\text{-}^{13}\text{C}_2$  acetate.

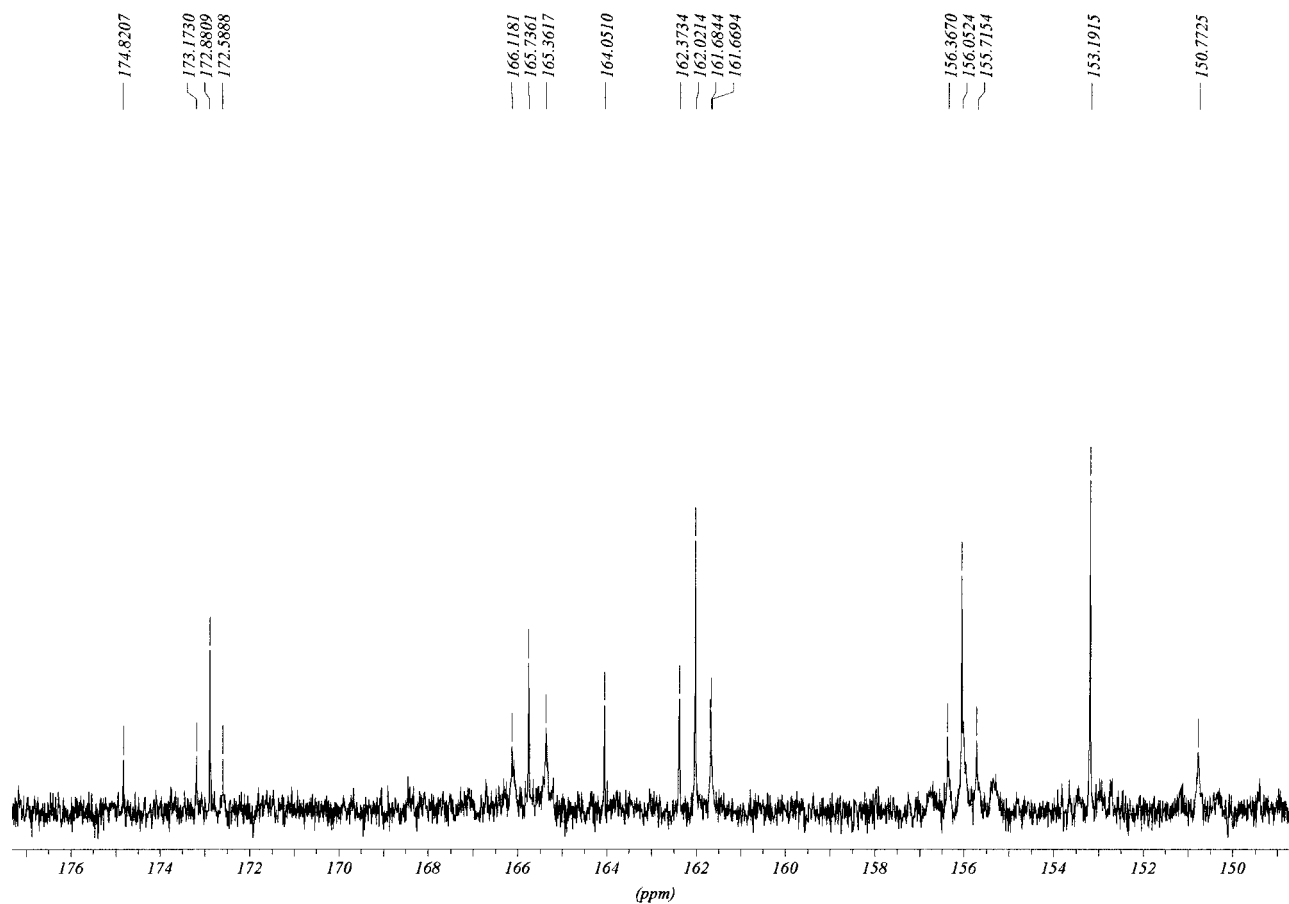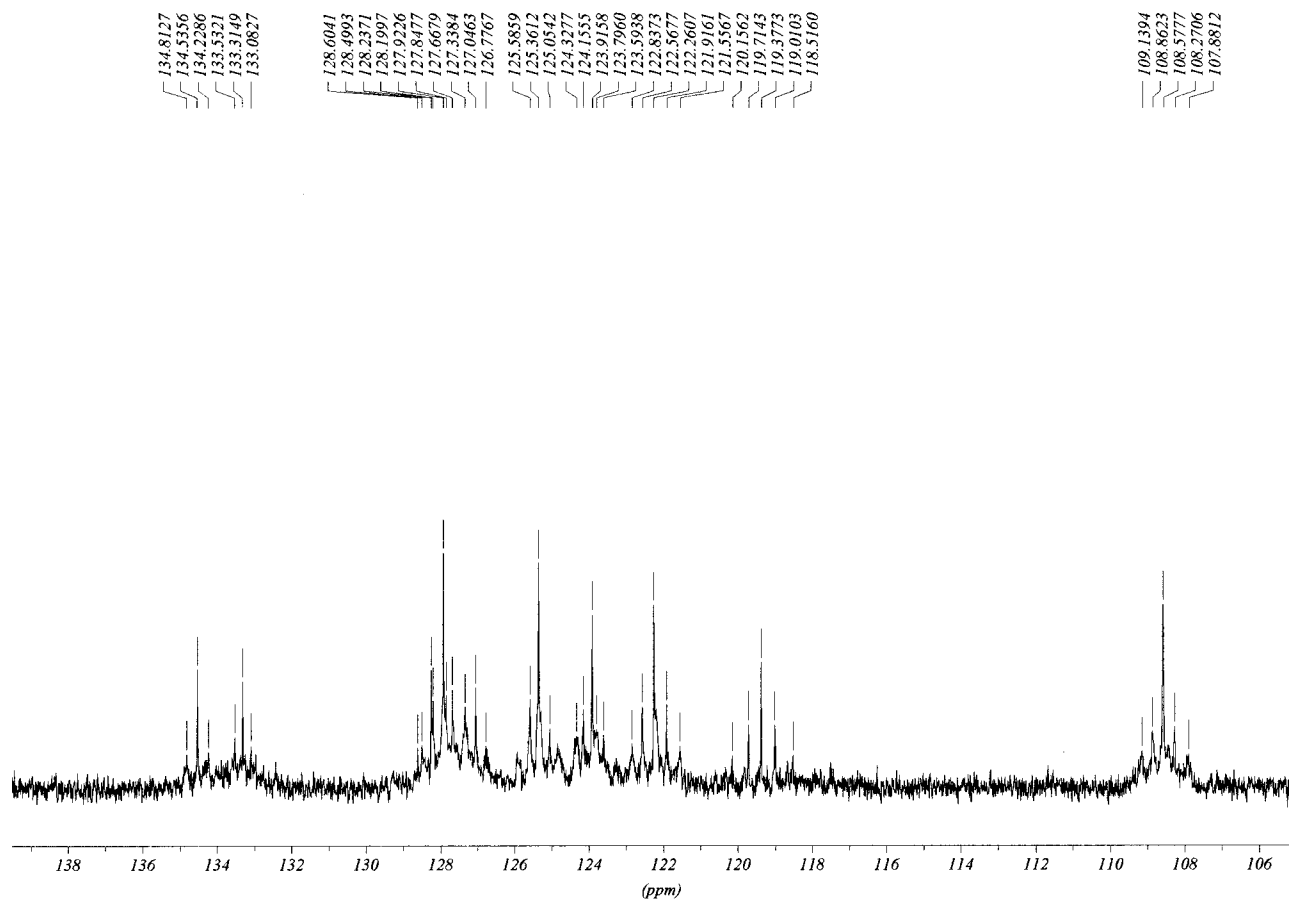

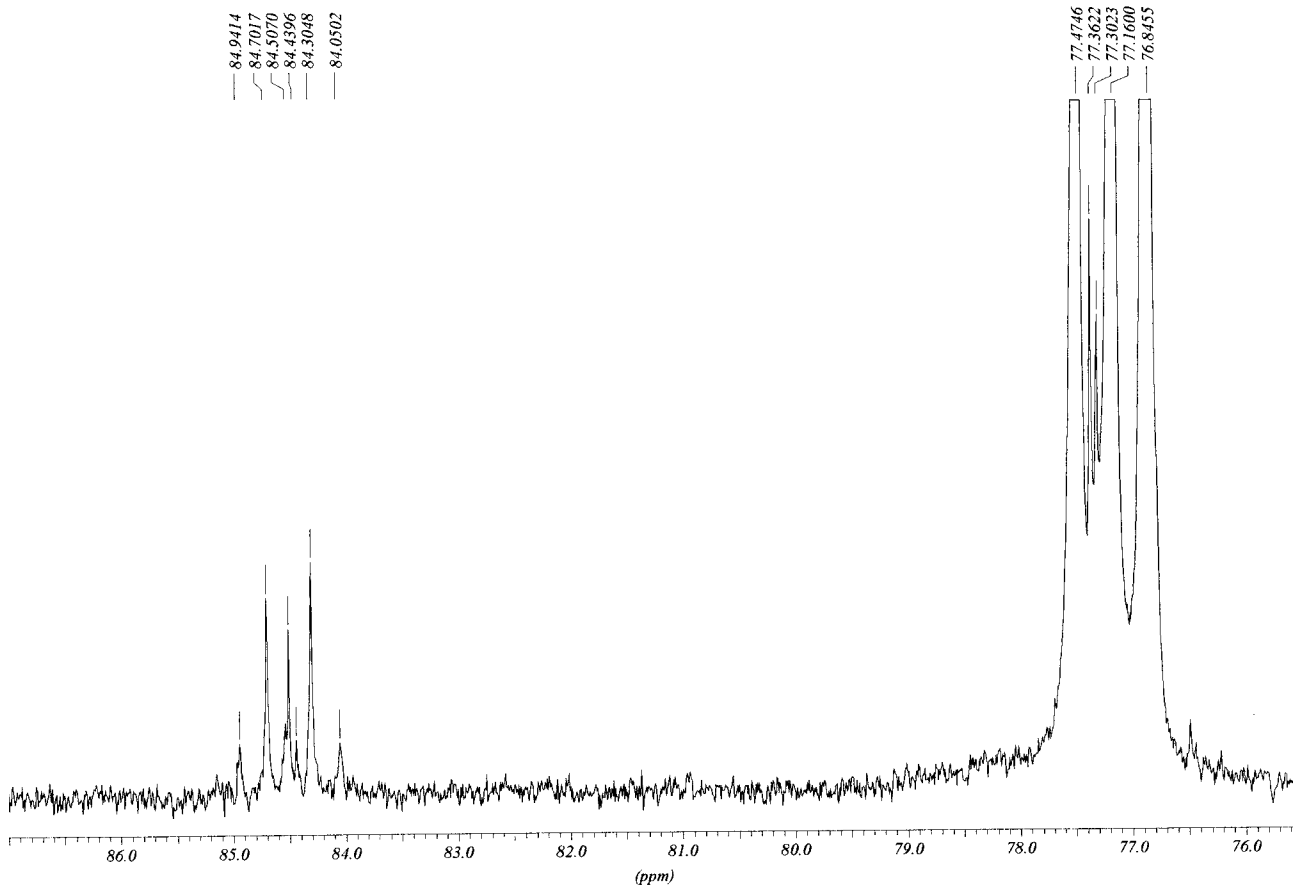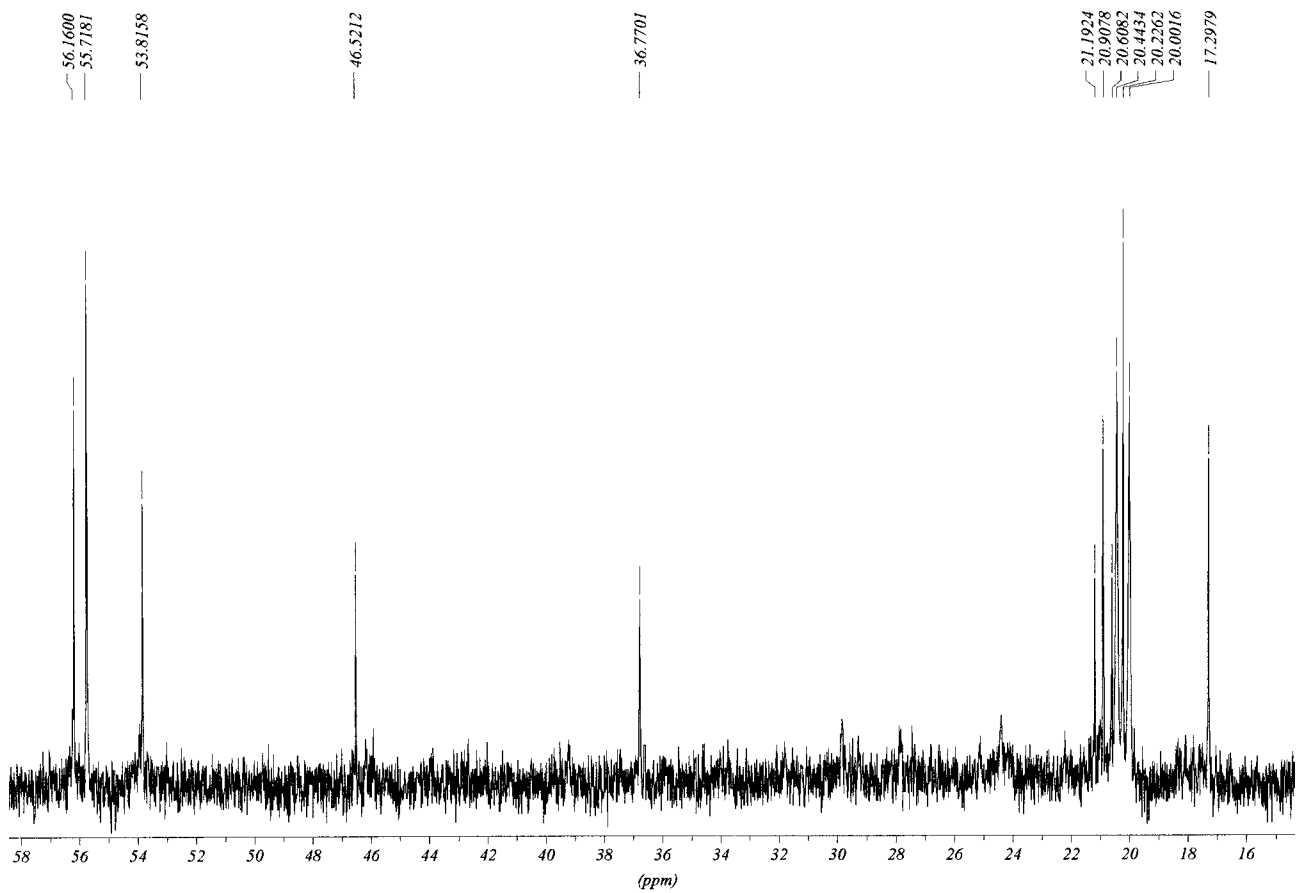

8.  $^{13}\text{C}$  NMR spectrum in  $\text{CD}_2\text{Cl}_2$  of azinomycin B after feeding  $1,2\text{-}^{13}\text{C}_2$  acetate.

Resonances from an unidentified impurity are marked with X.

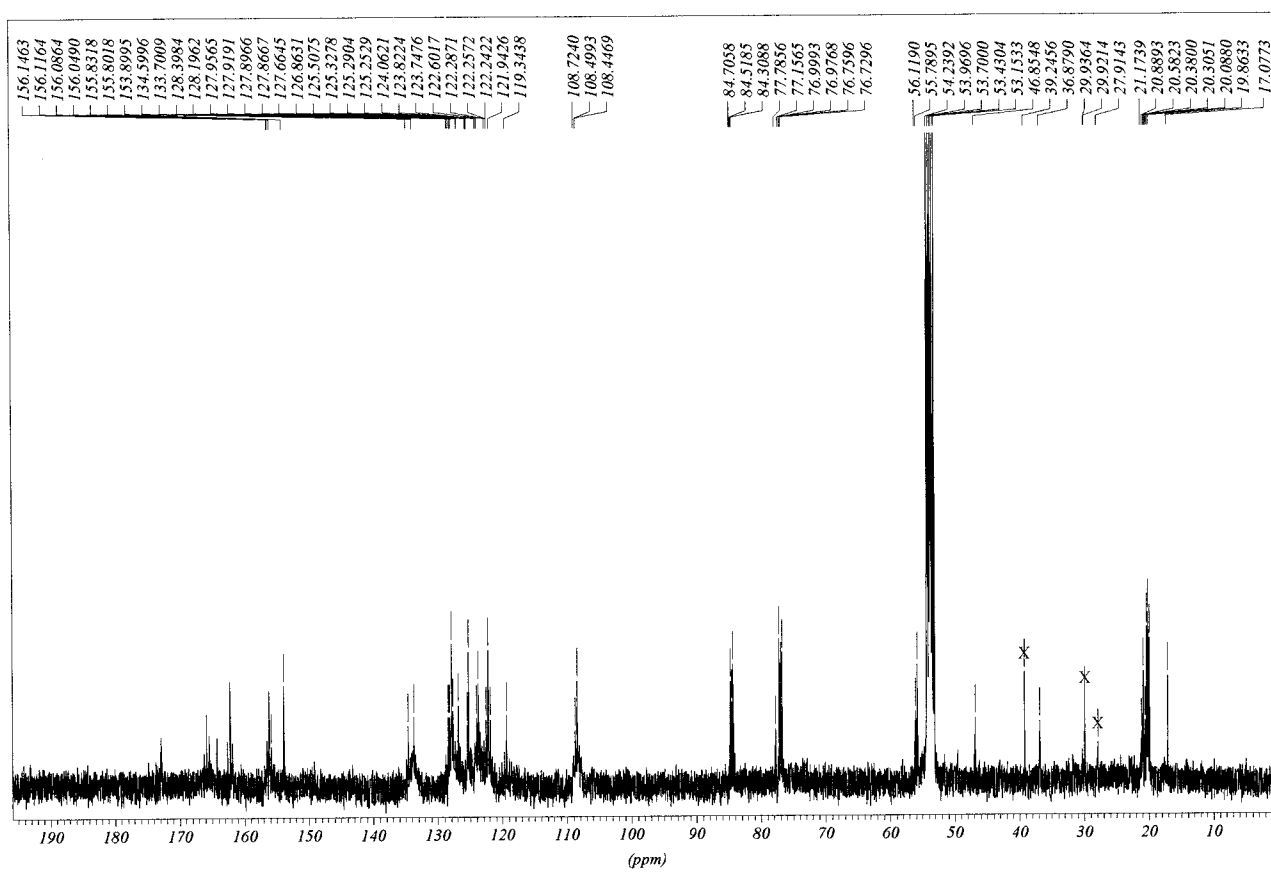

Expansions of  $^{13}\text{C}$  NMR spectrum in  $\text{CD}_2\text{Cl}_2$  of azinomycin B after feeding  $1,2\text{-}^{13}\text{C}_2$  acetate.

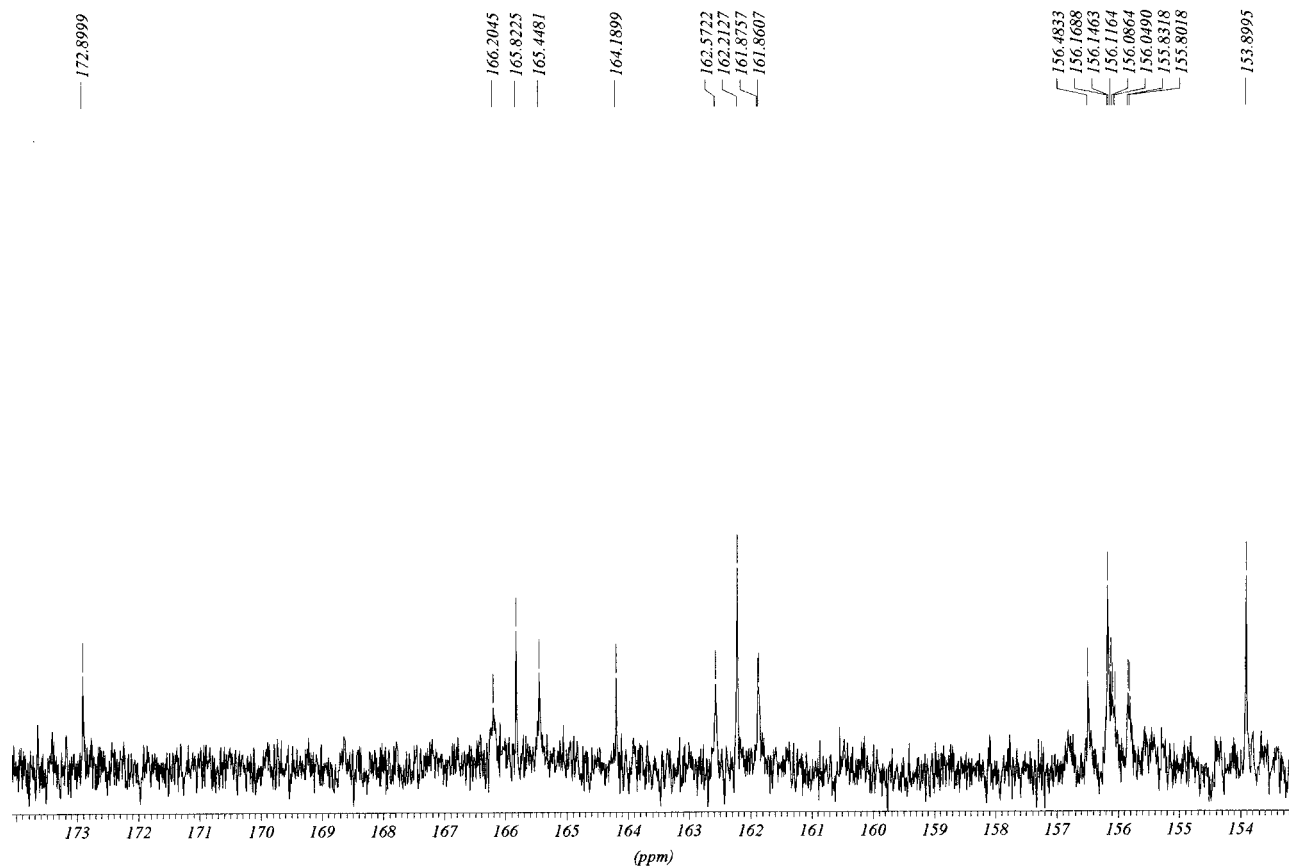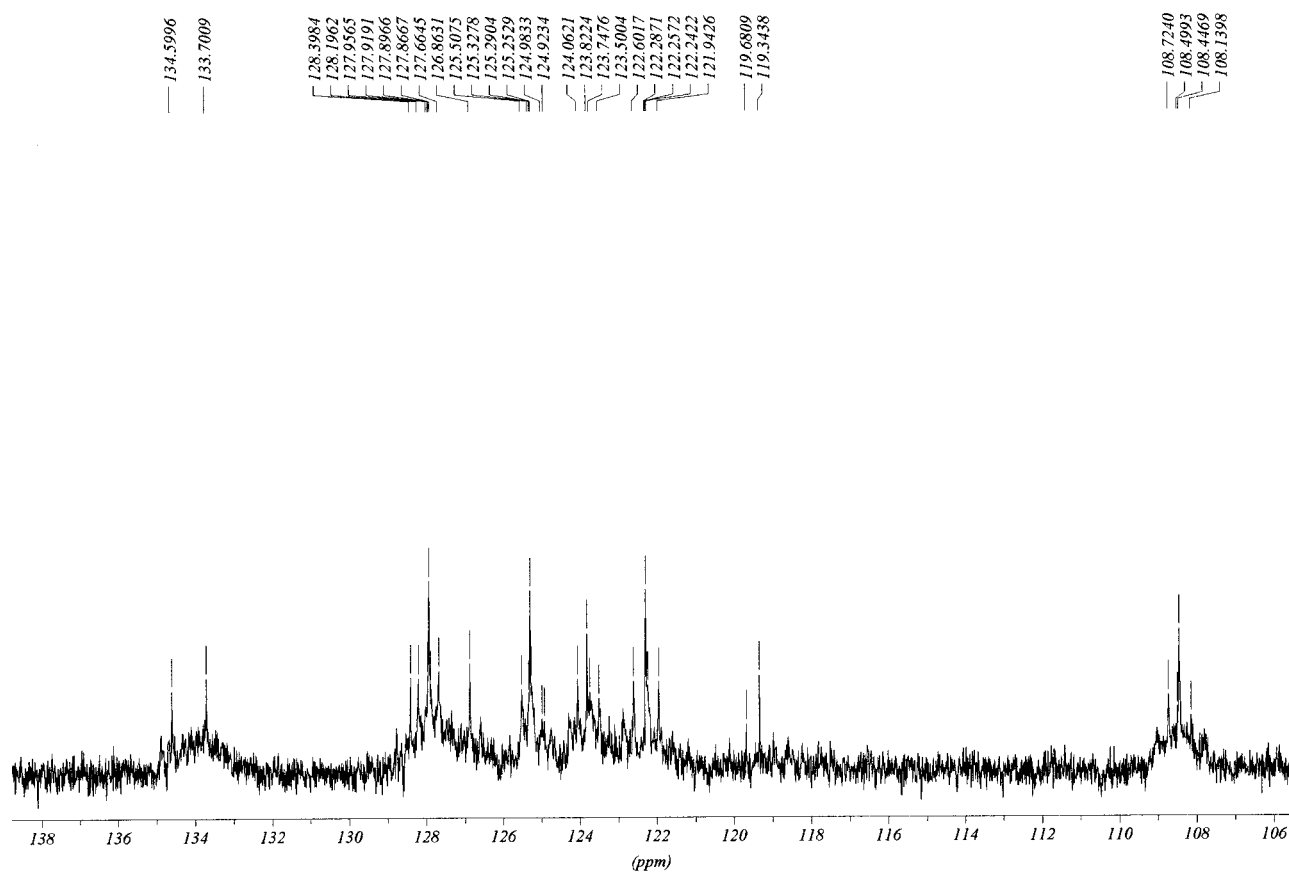

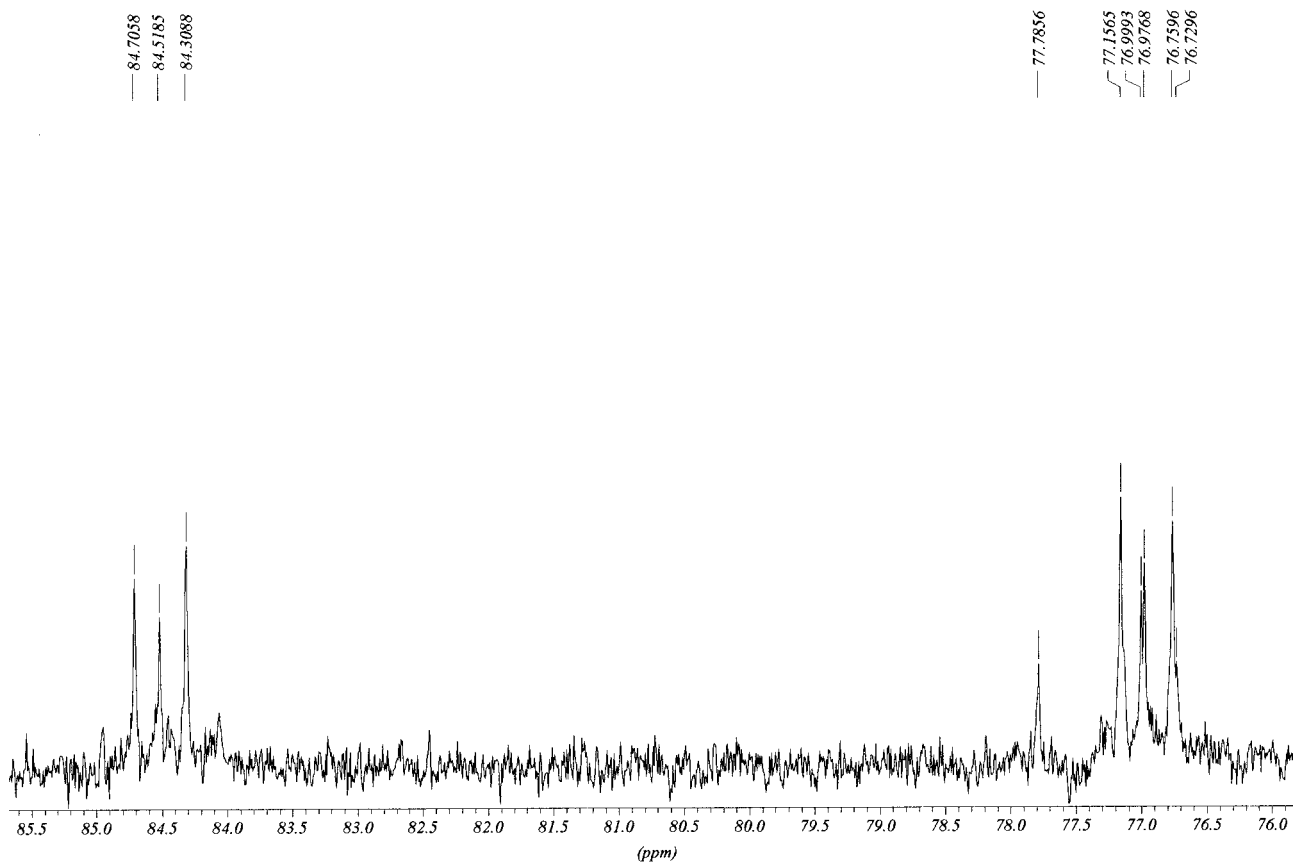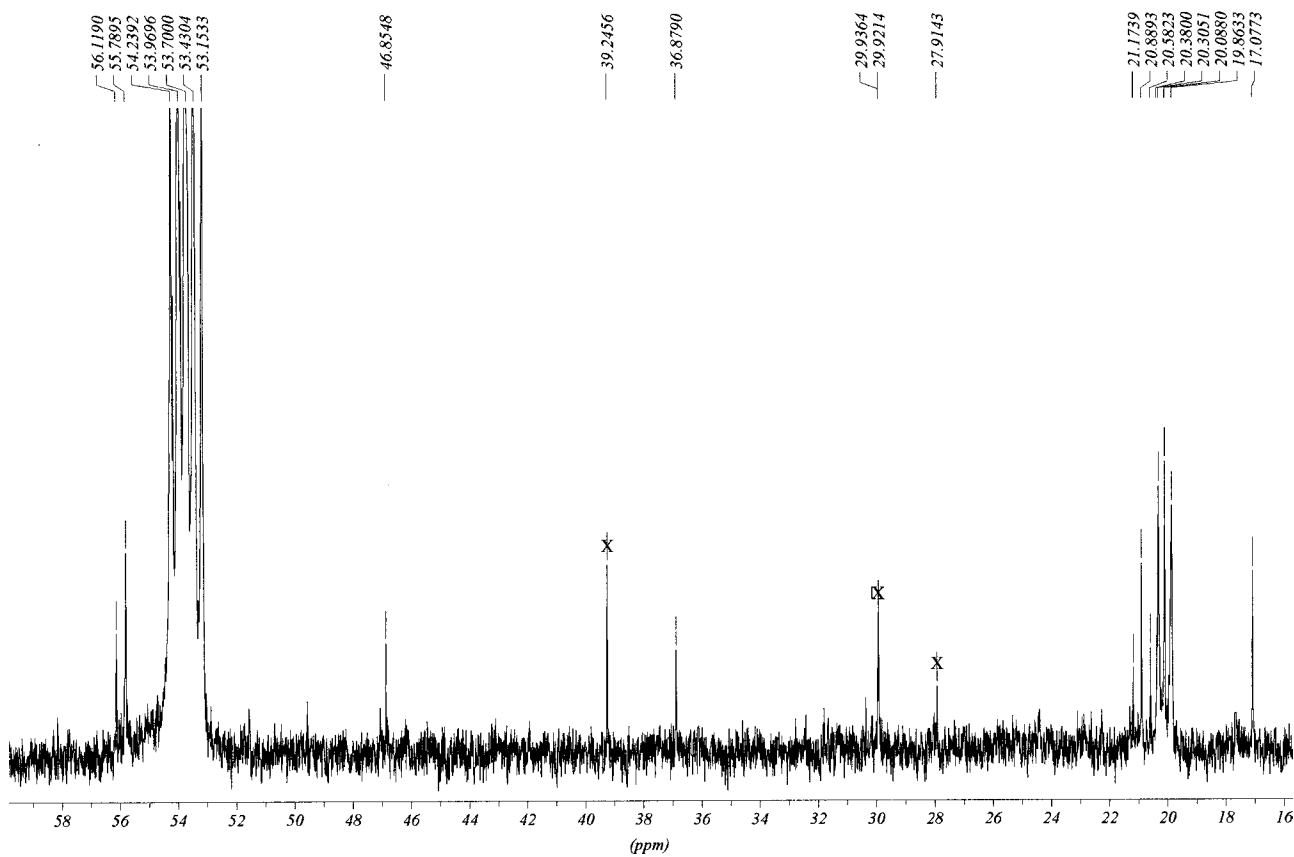

9.  $^{13}\text{C}$  NMR spectrum in  $\text{CDCl}_3$  of azinomycin B after feeding methyl- $^{13}\text{C}$ -methionine.

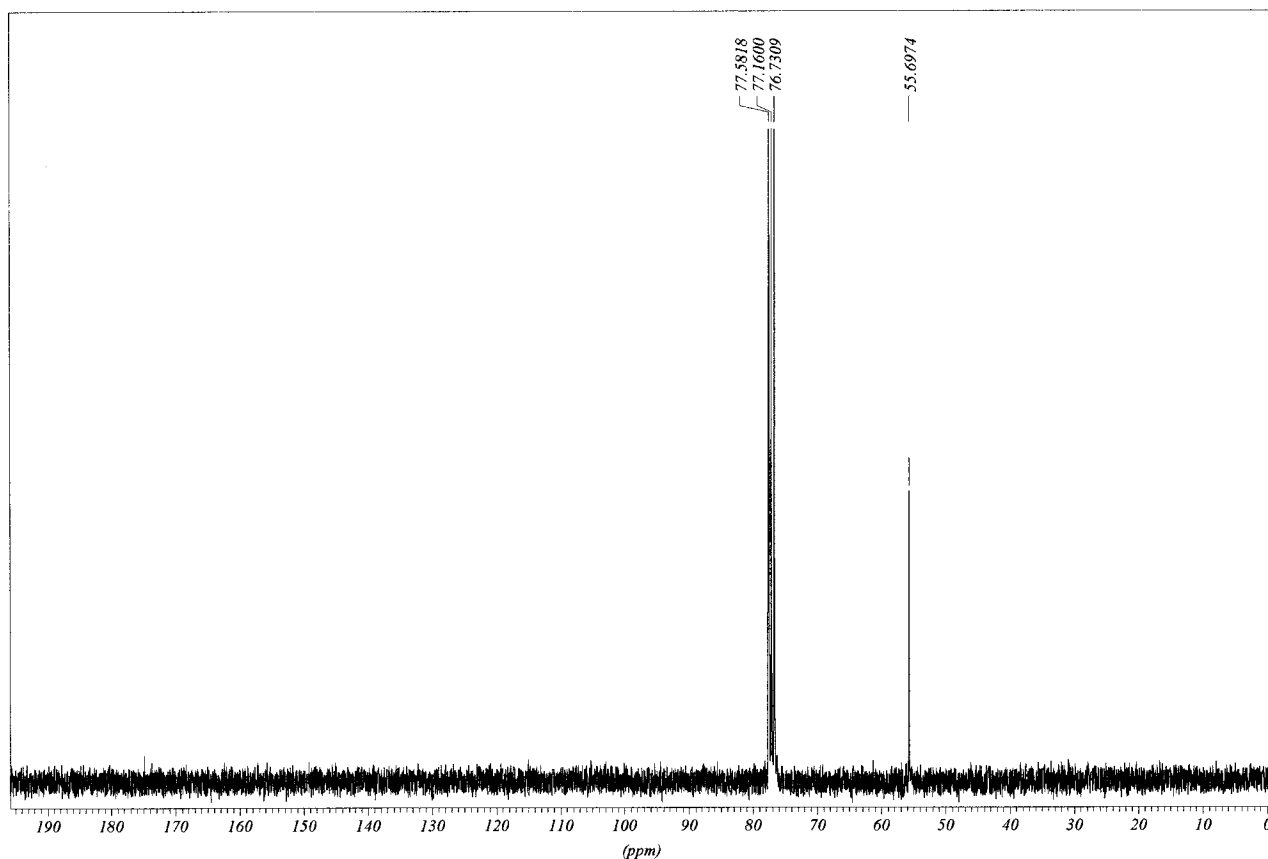

10. ESMS spectrum of azinomycin B after feeding methyl- $^{13}\text{C}$ -methionine.

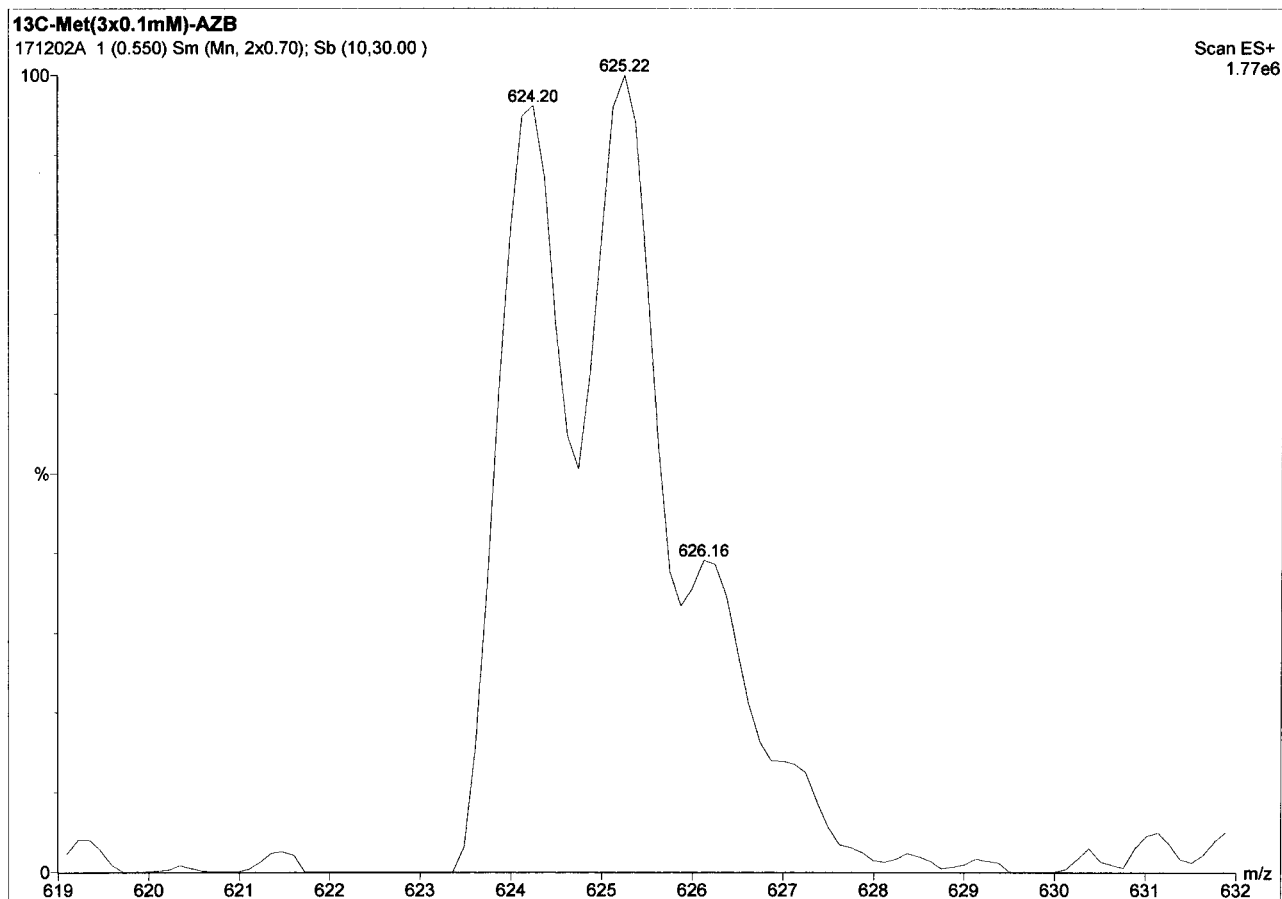

Supplement: b400093e.pdf [file b400093e.pdf]
